# Supplementary material for: The cyclic nature of porosity in anodic TiO2 nanotube arrays
Source: Royal Society of Chemistry journal article supplement (doi:10.1039/c4ta04607b), 2014-12-16
Supplement: c4ta04607b1.pdf [file c4ta04607b1.pdf]

## Supporting Information

### The cyclic nature of porosity in anodic TiO<sub>2</sub> nanotube arrays

**P. Quitério, A. Apolinário, C. T. Sousa, J. D. Costa, J. Ventura and  
J. P. Araújo\***

*IFIMUP and IN – Institute of Nanoscience and Nanotechnology, Departamento de Física e  
Astronomia, Faculdade de Ciências da Universidade do Porto, Rua do Campo Alegre, 678, 4169-007  
Porto, Portugal*

\*Corresponding author.

Email: [jearaujo@fc.up.pt](mailto:jearaujo@fc.up.pt)

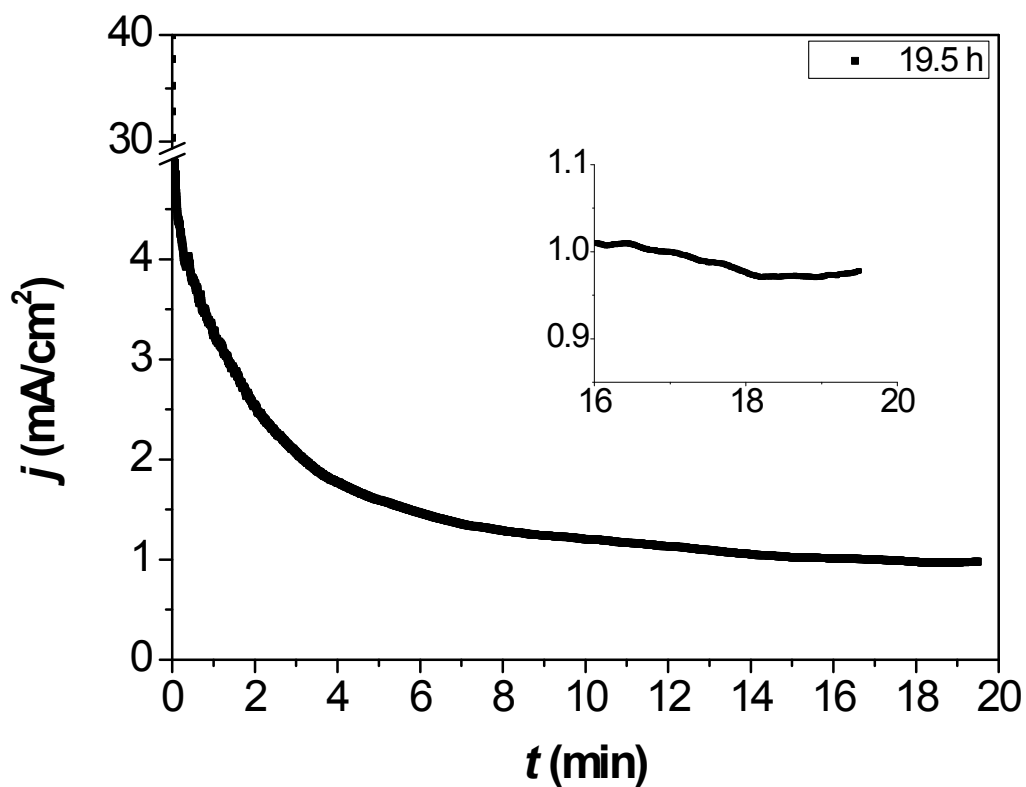

**Figure S1** Current density anodization curve [ $j(t)$ ] of the 19.5 h sample of TiO<sub>2</sub> NTs. The inset shows a current density stable period ( $\sim 1.4$  h) before the  $j^{\text{1st}}$  bump. Example of anodization corresponding to a stable self-ordering regime.

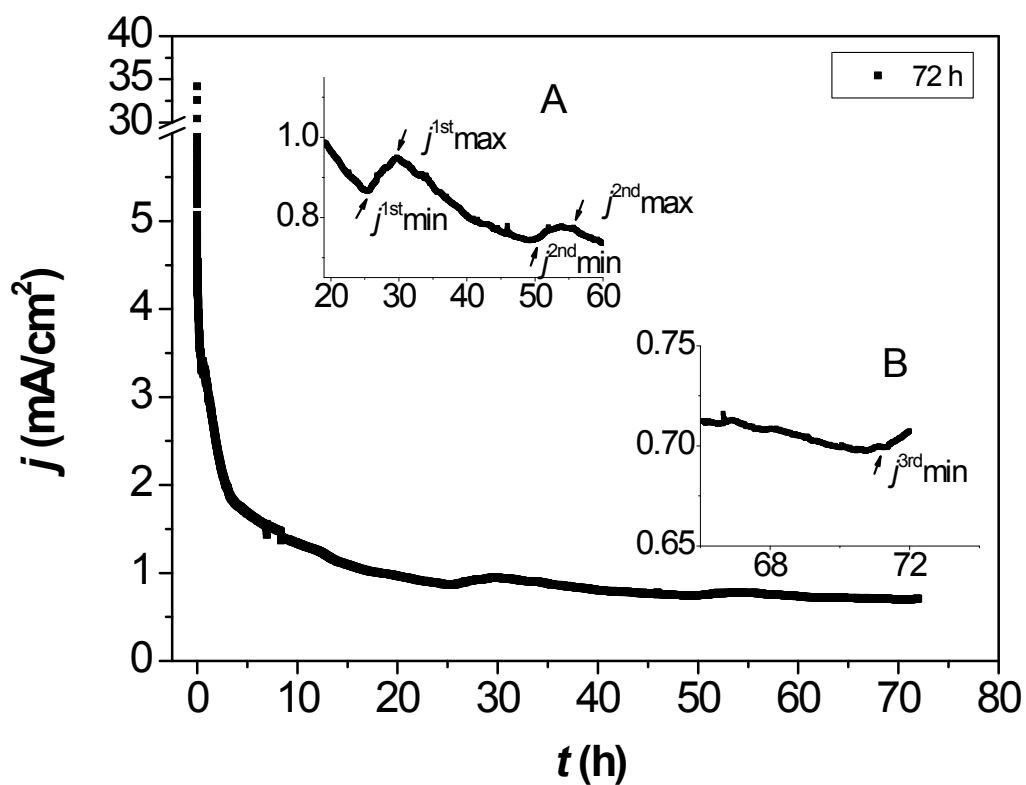

**Figure S2** Current density anodization curve [ $j(t)$ ] of the 72.0 h sample of TiO<sub>2</sub> NTs. Inset A shows the  $j^{1st}$  bump ( $j^{1st\ min}$  until  $j^{1st\ max}$ ) and the  $j^{2nd}$  bump ( $j^{2nd\ min}$  until  $j^{2nd\ max}$ ) and inset B shows the beginning of a  $3^{rd}$  current bump ( $j^{3rd\ min}$ ).
